# Supplementary material for: 50-year seasonal variability in East African droughts and floods recorded in central Afar lake sediments (Ethiopia) and their connections with the El Niño–Southern Oscillation
Source: Copernicus journal article supplement (doi:10.5194/cp-20-1837-2024), 2024-08-15
Supplement: Supplementary file 1 [file cp-20-1837-2024-supplement.pdf]

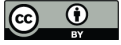

*Supplement of*

**50-year seasonal variability in East African droughts and floods recorded in central Afar lake sediments (Ethiopia) and their connections with the El Niño–Southern Oscillation**

**Carlo Mologni et al.**

*Correspondence to:* Carlo Mologni (mologni@geoazur.unice.fr)

The copyright of individual parts of the supplement might differ from the article licence.

|                                                              |    |
|--------------------------------------------------------------|----|
| S1. Seismic survey and imagery of Lake Gemeri.....           | 1  |
| S2. Runoff-rainfall model diagram.....                       | 2  |
| S3. Principal Components Analysis.....                       | 3  |
| S4. Paleomagnetic study on Lake Gemeri GEM18-03/04 core..... | 5  |
| S5. Loss on Ignition.....                                    | 11 |
| S6. Clay X-Ray Diffraction.....                              | 11 |
| S7. GEM18 ICP-MS and XRF geochemistry results.....           | 13 |
| S8. Radiocarbon material sampling AFA18-02 ore.....          | 16 |
| S9. Radiocarbon material sampling GEM18-03/-04B core.....    | 17 |
| S10. Grain Size distribution.....                            | 17 |
| S11. Stokes Law calculation of Lake Afambo sediments.....    | 18 |
| S12. Lake Gamari Water Surface Variations.....               | 20 |

## S1. Seismic survey and imagery of Lake Gemeri

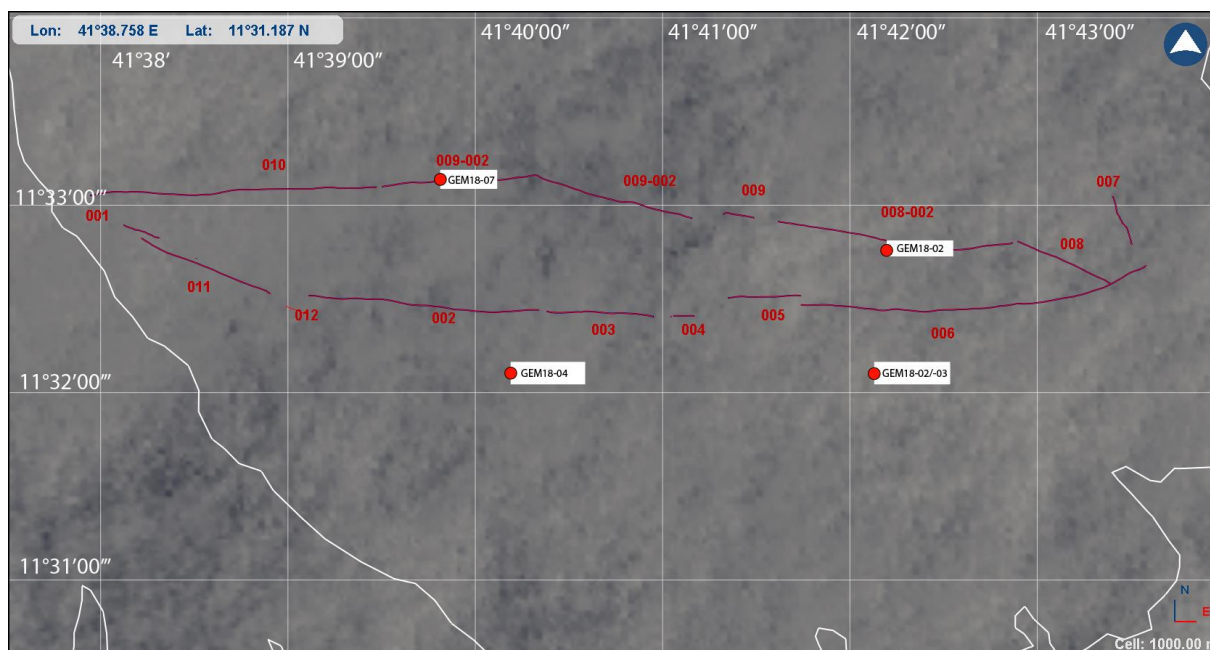

Figure S1 : Location of seismic profiles and the coring sites on Lake Gemeri (Gourguen Davtian). Red lines and numbers refers to the seismic profiles and numbers; Red dots refer to the coring sites and white line refers to the lake limits.

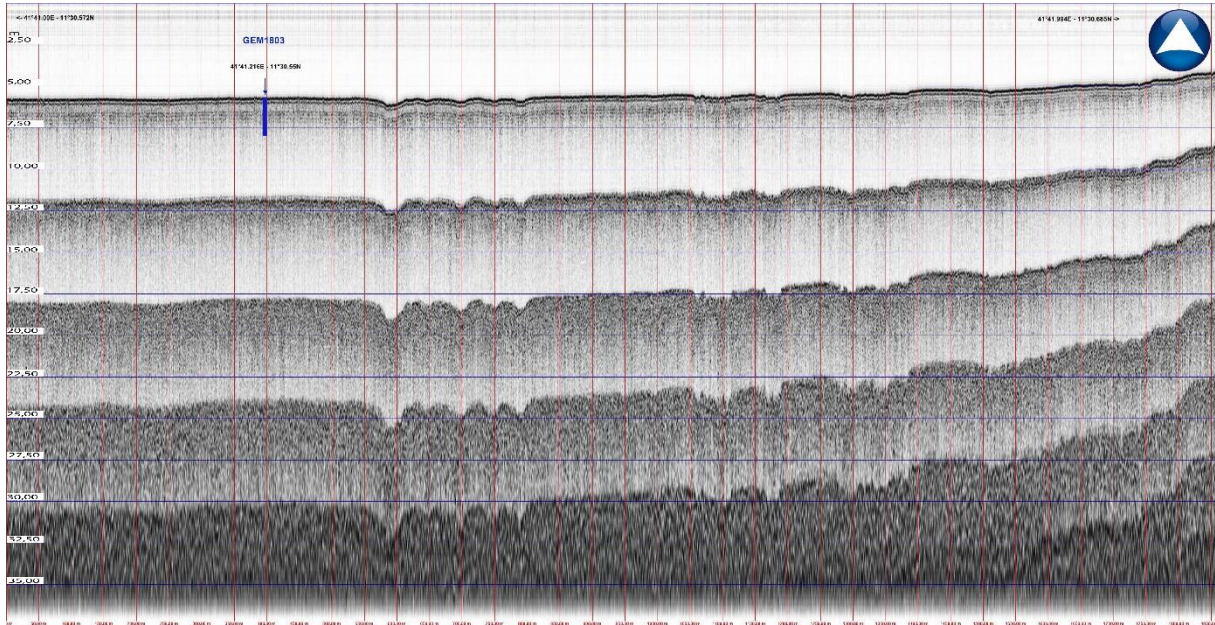

Figure S2 : Seismic profile 006 on Lake Gegeri, with the indication of the coring site (blue arrow; GEM18-03 core).

## S2. Runoff-rainfall model diagram

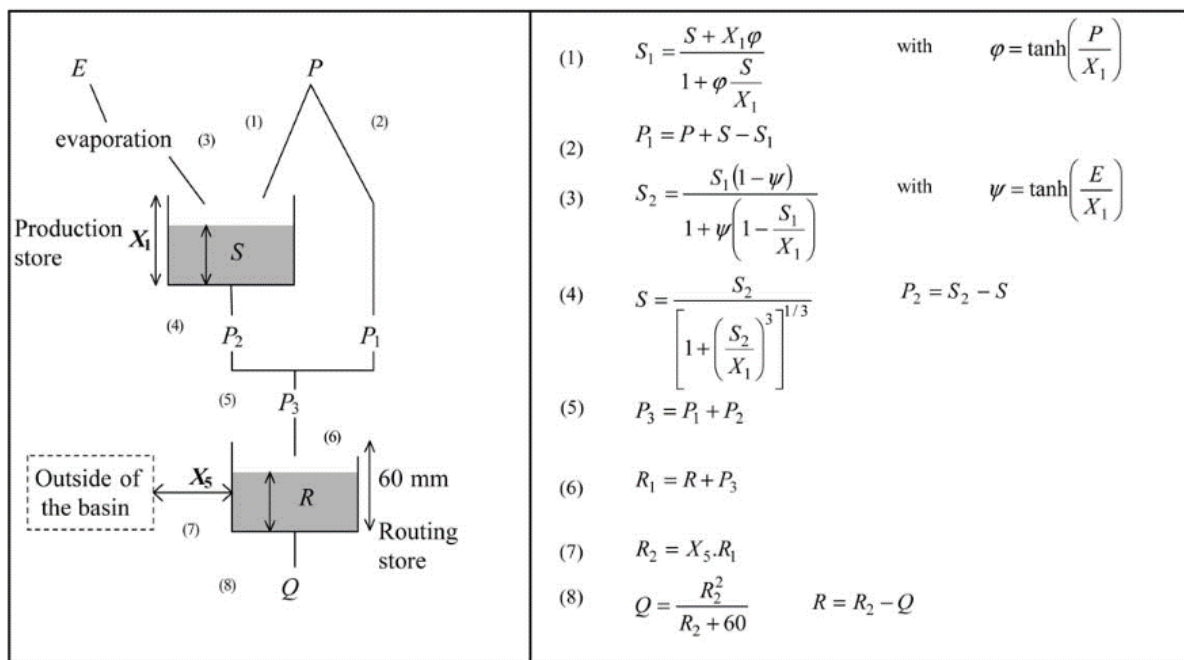

Figure S3 : Diagram of the GR2M model (Mouehli et al., 2006).

### S3. Principal Components Analysis

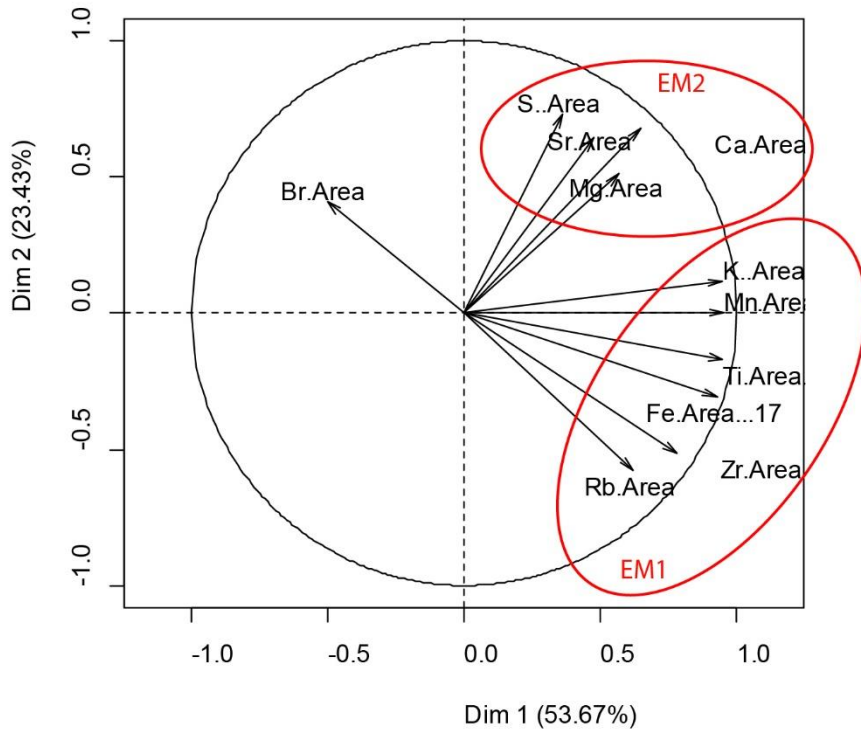

Figure S4 : PCA graph variable of normalized AFA18-02 XRF data analysis on Dim1 with the distinguished End Member-1: Ti, Fe, Zr; End Member-2: Ca, Mg, Sr, S; End-Member-3: Br. Such results are interpreted into the main text.

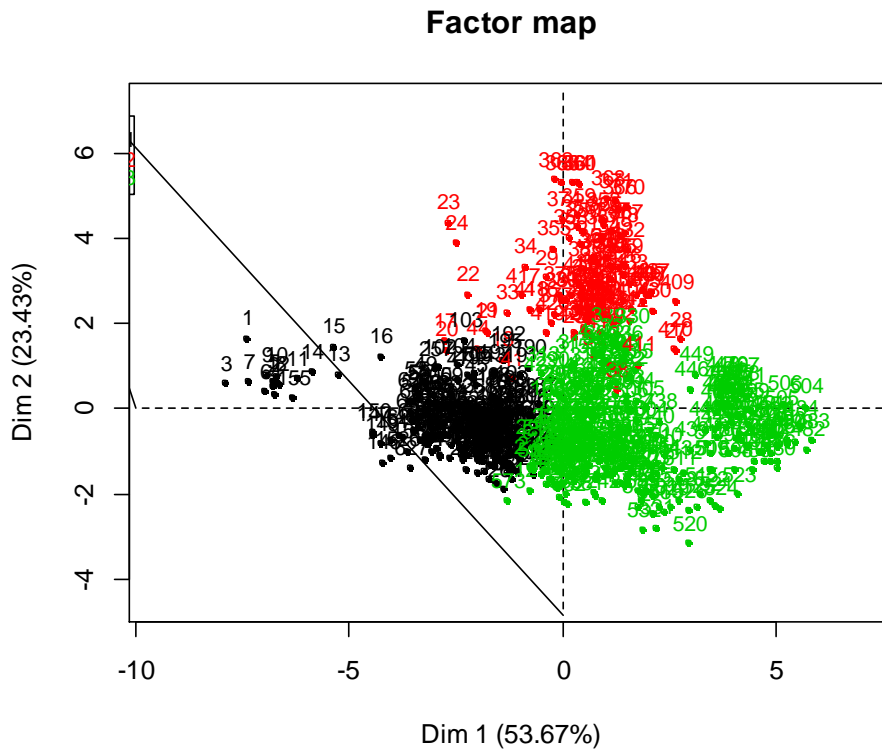

Figure S5 : PCA graph variable of normalized AFA18-02 XRF data analysis on Dim1. Green dots are corresponding to F1 layers coinciding with End Member-1; red dots are corresponding to F2/F3 layers coinciding with PCA End Member-2.

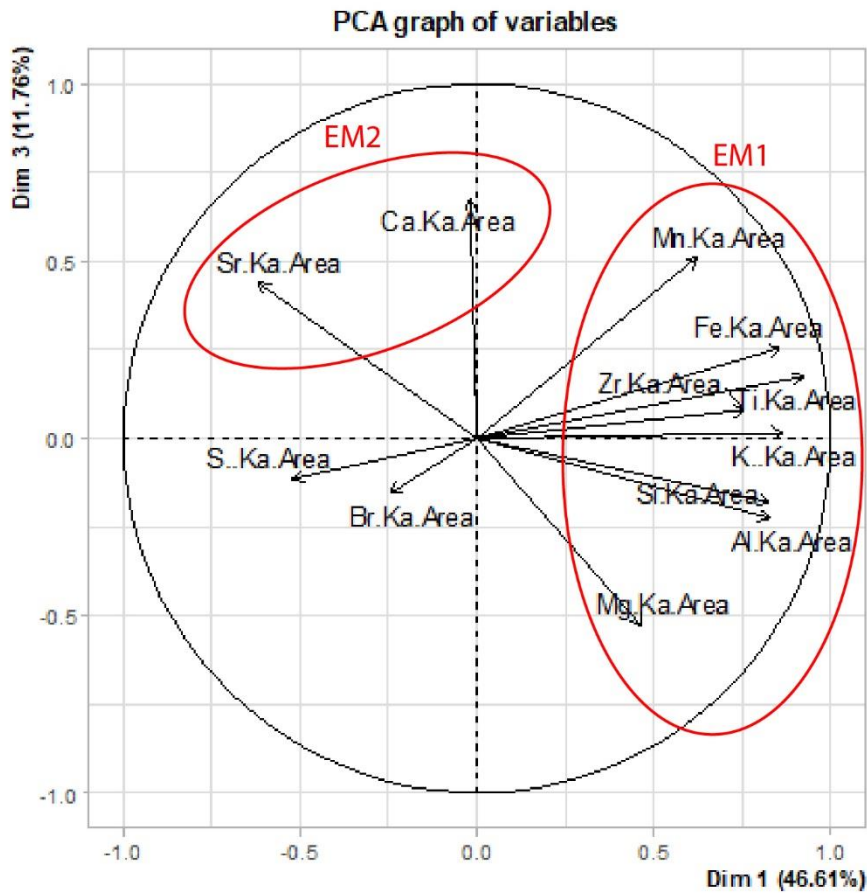

Figure S6: PCA graph variable of GEM18-03/-04B XRF normalized data analysis on Dim1/Dim3. End members 1 and 2 are defined and interpreted in the main text.

## S4. Paleomagnetic study on Lake Gemeri GEM18-03/04 core

### S4.1. Methods

The two GEM18-03 and GEM18-04B sections were sampled continuously in their centre using u-channels. The u-channel is only partly filled in the first 16 cm of GEM18-03 and between 81 and 89 cm in GEM18-04B (i.e., between 196 and 204 cm of GEM18-03/04B). In GEM18-04B between 14 and 19 cm (i.e., between 129 and 134 cm of GEM18-03/04B), the sediment, stickier at these depths, was also disturbed during subsampling.

All magnetic measurements were performed at the palaeomagnetic laboratory of LSCE (Gif-sur-Yvette, France). The low-field volume magnetic susceptibility ( $X$ ) was measured every centimeter using a horizontal automated translation system equipped with a MS2-C Bartington coil. In the  $\mu$ -metal shielded room of LSCE, the natural remanent magnetization (NRM) was measured with a 2 cm step using a helium-free 2G Enterprises cryogenic magnetometer with high-resolution pick-up coils (4.5 cm width on x and y coils, 5.8 cm on z). Stepwise alternating field (AF) demagnetization of the NRM was conducted with the 2G-AF demagnetizer in-line with the magnetometer. The successive steps were fixed to 5, 10, 15, 20, 25, 30, 35, 40, 45 and 50 mT. The direction of the characteristic remanent magnetization (ChRM) was estimated by principal component analysis (Kirschvink, 1980).

In a second step, anhysteretic remanent magnetization (ARM) and isothermal remanent magnetization (IRM) were measured to investigate the ferromagnetic mineralogy. ARM was acquired in a 100 mT AF field and a 50  $\mu$ T direct current bias field applied along the axis of the u-channel. This ARM was AF demagnetized with the same steps as for the NRM. IRM was acquired in six steps up to 1 T using a 2G pulsed solenoid in-line with another similar cryogenic magnetometer. After an AF demagnetization of this IRM (always with the same sequence), two additional steps at -1 T and 0.3 T were applied to estimate the contribution of high-coercivity grains to the remanent magnetization with the S-ratio ( $S_{0.3T} = -IRM_{0.3T} / IRM_{-1.0T}$ ).

In order to confirm the rock magnetic identifications, sediment was subsampled in the u-channels at nine different depths (12, 25, 45, 65, 100, 125, 145, 170 and 210 cm). After drying, hysteresis curves up to 1 T, IRM backfield curves and first order reversal curves (FORC) diagrams were performed on  $\sim$  50 mg chips using a 8600 Lakeshore vibrating sample magnetometer (VSM). Finally, continuous thermomagnetic curves were measured up to 640°C on powders from these nine samples using a Petersen Instruments variable field translation balance (VFTB).

### S4.2. Results

#### S4.2.1 Magnetic mineralogy

The profiles of low-field susceptibility (Fig S7a) and NRM intensity (Fig. S7b), as well as those of ARM and IRM intensities, show similar trends. Three different zones can be identified. In the first 20 cm, the low values are probably an effect of the high degree of liquefaction of the sediment. Below, the sediments pedogenized during the drought of the lake in the 1990s are characterized by the highest values of susceptibility and magnetization intensities with a decrease from the top of this layer (around 20-25 cm) to its base around 40 cm. Between 40 and 220 cm, the parameters vary by less than a factor of three, suggesting no large changes of the concentration in magnetic particles through time. This concentration appears relatively high regarding the average values of low-field susceptibility ( $\sim 850 \times 10^{-6}$  SI) and NRM intensity ( $\sim 70 \times 10^{-3}$  A/m).

All further rock magnetic results, as for example the acquisition and demagnetization curves of ARM and IRM, highlight the homogeneity of the ferromagnetic mineralogy below 40 cm. The S-ratios remain



stable between 0.96 and 0.98, which shows the quasi-absence of high coercivity minerals such as hematite or goethite (Fig. S7c). Together with the median destructive field (MDF) values between 18 and 21 mT (Fig. S7d), it suggests that the main magnetic carrier is titanomagnetite not only below 40 cm but also in the 20-40 cm pedogenized sediment. The first 20 cm presents also a high-coercivity phase, but in minor proportion because S-ratio values are always above 0.90. Experiments on discrete samples support these interpretations. Except the sample at 12 cm, all IRM backfield curves are saturated at 300 mT (Fig. S7a). 8/9 thermomagnetic curves are very similar with a single ferromagnetic phase, identified as an almost pure magnetite by its Curie temperature between 560 and 570°C (Fig. S8b). A second phase with a Curie temperature around 100°C, likely a Ti-rich titanomagnetite, is also present in the sample at 170 cm.

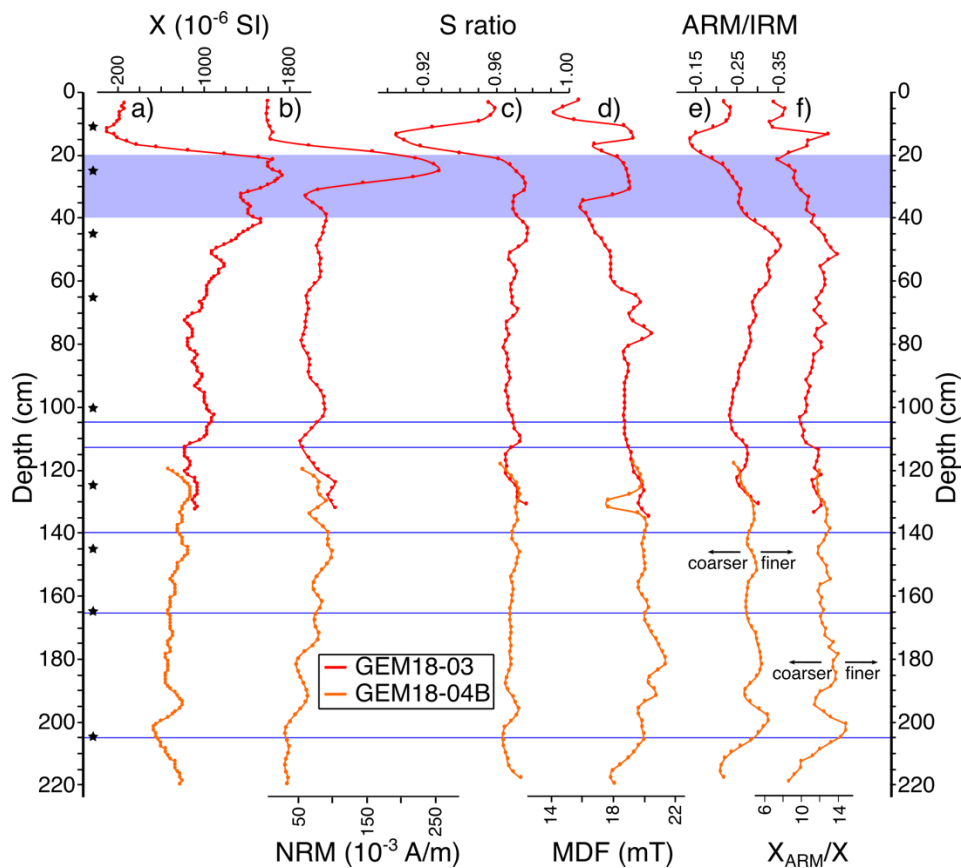

Figure S7: Variation along GEM18-03/04B core of a) low-field magnetic susceptibility ( $X$ ), b) intensity of the natural remanent magnetization (NRM), c) S-ratio, d) median destructive field (MDF), e) ratio of the intensities of anhysteretic over isothermal remanent magnetization (ARM/IRM) and f) ratio of ARM susceptibility over low-field susceptibility. The two parameters in e-f are proxies of the magnetite grain size). Black stars show depths of discrete samples for rock magnetic experiments. Blue lines indicate depths with abrupt variations in Sr, Fe/Mg and Fe/K ratios, corresponding to pedogenic events.

The ratio of ARM and IRM intensities (ARM/IRM, Fig. S7e) and the ratio of ARM susceptibility over low-field susceptibility ( $X_{\text{ARM}}/X$ , Fig. S1f) are proxies of the magnetite grain size. Both parameters do not show a significant variation below 40 cm, especially between 40 and 200 cm. In the Day plot, corresponding discrete samples fit in the pseudo single domain (PSD) field (Fig. S8c), likely indicating a mixture of single-domain (SD) and multidomain (MD) grains. FORCs diagrams are representative of this composition. The pedogenic process results in slightly coarser grains. This behaviour is especially

observed in ARM/IRM and  $X_{\text{ARM}}/X$  curves (Fig. S7e-f) and on the binary plot ARM intensity versus  $X$  (Fig. S8), while the Day plot and the FORC diagrams appear less sensitive to this slight size change.

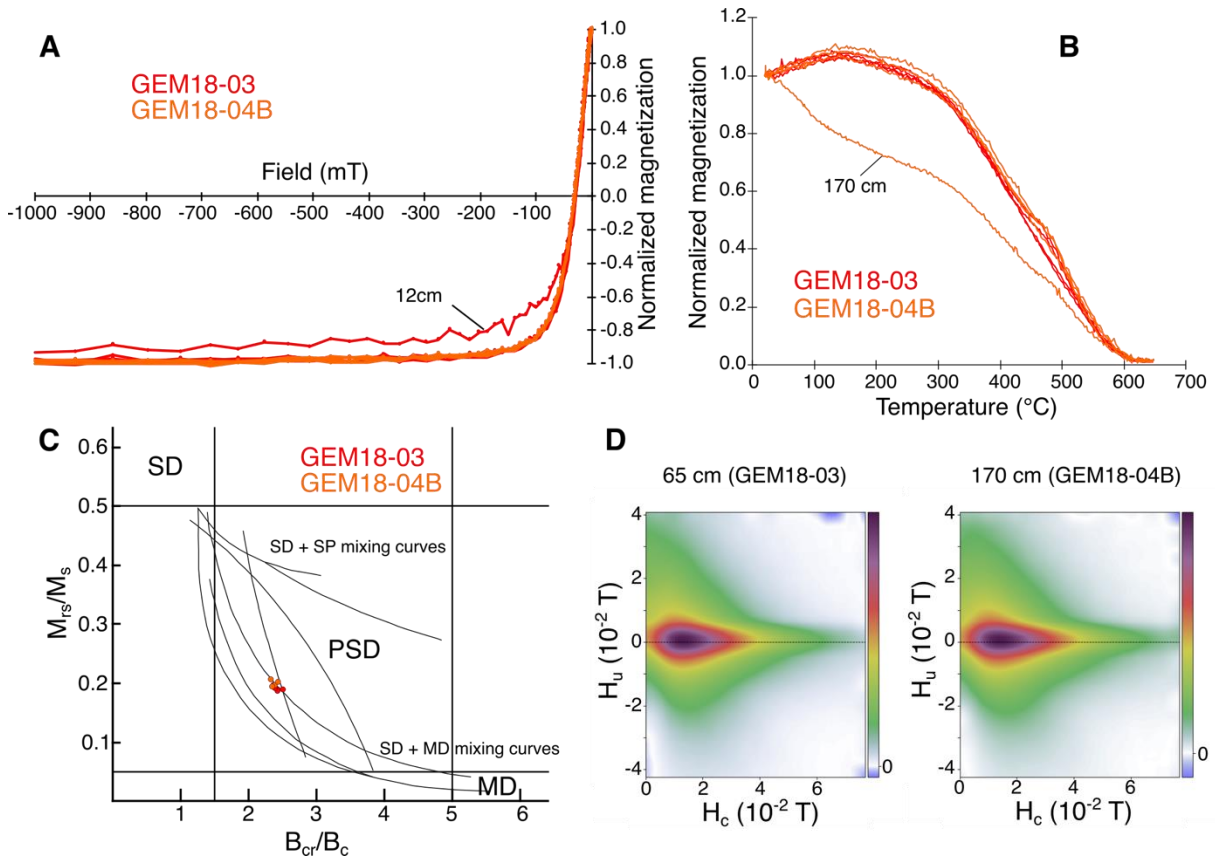

Figure S8: Rock magnetic results on 9 discrete samples from GEM18-03/04 core (at 12, 25, 45, 65, 100, 125, 145, 170 and 210 cm). A) Normalized IRM backfield curves. B) Normalized thermomagnetic curves (only heating curves). C) Day plot of the ratio of the saturation remanent magnetization ( $M_{rs}$ ) upon the saturation magnetization ( $M_s$ ) versus the ratio of the coercive remanent field ( $B_{cr}$ ) upon the coercive field ( $B_c$ ). D) FORC diagram of two samples.

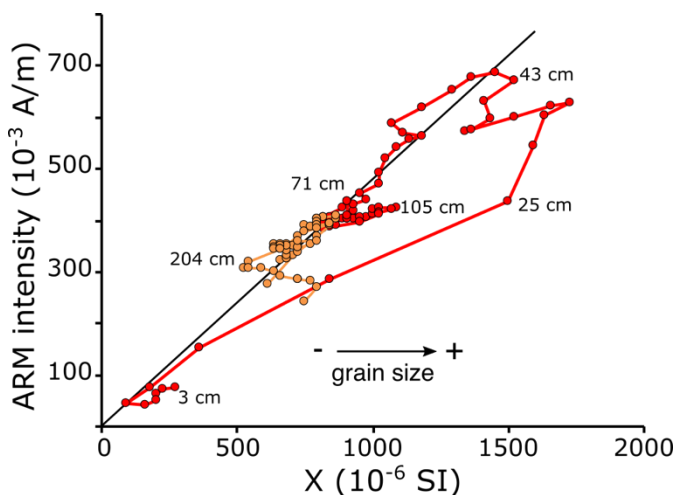

Fig. S9: ARM intensity versus low-field susceptibility plot. Deviations from the line, as between 20 and 40 cm, highlight coarser ferromagnetic grains.



To summarize, all results converge towards a homogeneous ferromagnetic mineralogy composed by almost pure magnetite below 40 cm. These properties, reminding those of volcanic samples, indicate a lithogenic origin of the magnetic grains, which came from the erosion of stratoid basalts and were transported by the Awash River. These results allow to conclude that the NRM is mainly constituted by a detrital remanent magnetization (DRM) below 40 cm.

The plot of the susceptibility and of the ARM intensity provides information on the variation of the concentration in magnetic grains along the core (Fig. S9). No major changes are observed between 220 and 70 cm with a variation of the two parameters by less than two. From 70 to 40 cm (the lower limit of the pedogenized sediment), the progressive increase may indicate a more important lithogenic input into the lake during the 20<sup>th</sup> century.

In the case of the pedogenic event recorded between 20 and 40 cm, higher susceptibilities were expected for such soil formation (e.g., Maher and Taylor, 1988). The S-ratios close to 1.0 show that the process is not characterized by the creation of high-coercivity minerals (e.g., hematite or goethite). The average size of magnetite grains is slightly coarser (Fig. S7e-f and Fig. S9). Reminding that the PSD behaviour is explained by a mixture of SD and MD grains, we interpret the increase of the average size by dissolution of the finest SD magnetite grains.

The fact that the magnetic properties of this pedogenesis are not encountered elsewhere in the core highlights that the lake were not affected in its recent past by a drought event as long as in the 1990s. The pedogenic events highlighted by geochemical results at 105, 113, 140, 165.5 and 210 cm are not associated to a significant variation of the magnetic properties, except maybe at 105 and 210 cm (Fig. S7 and S9). The duration of these events is likely too short for the temporal resolution of the magnetometer. We therefore consider that the core GEM18-03/04B is not significantly affected by pedogenesis below 40 cm, allowing to investigate the secular variation of the geomagnetic field.

#### S4.2.2 Directional study

After removing a minor component of magnetization, probably of viscous origin, all Zijdeveld diagrams highlight a stable ChRM above 10 mT (15-20 mT for a few samples) (Fig. S10). This ChRM is well-defined with an average maximum angular deviation (MAD) value of 1.5° (Fig. D5a).

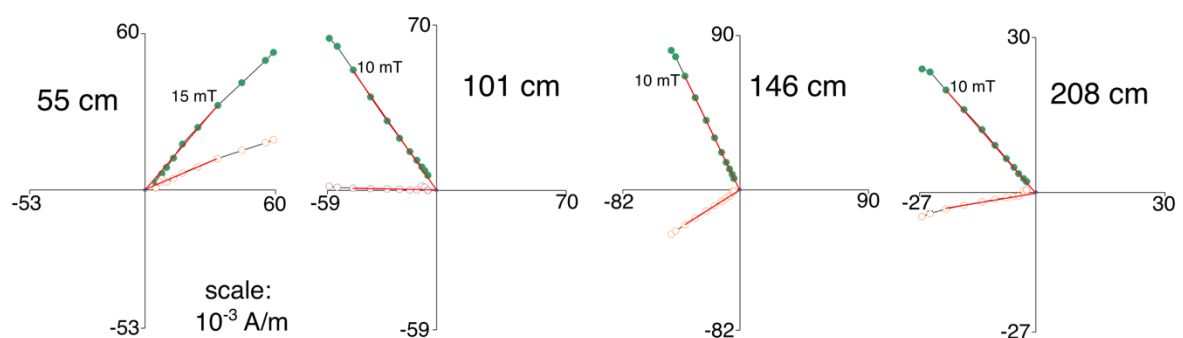

Figure S10: AF demagnetization results with examples of Zijdeveld plots. The open and full circles are the projections upon vertical and horizontal planes respectively. The red line shows the direction of the ChRM component.

The variation of declination and inclination through the u-channels are plotted in Figure S5b-c. The fast variation in the first 20 cm reflects the difficulty to preserve the signal in liquefied sediment during coring. For interpretation, we also discarded the 20-40 cm depths at which the initial remanent magnetization was likely modified by pedogenic processes during drying-up of the lake from 1984 to

1999. In GEM18-04B, the slight directional variations between 129 and 134 cm and between 196-204 cm can be explained by problems during preparation of the u-channel and the directions around these depths were considered unreliable.

The core was not azimuthally oriented and the declination requires adjustment. For GEM18-03 section, we based on the age model established with short-lived radionuclides ( $^{210}\text{Pb}$  and  $^{137}\text{Cs}$ ) and on the prediction at Lake Gemi of the International Geomagnetic Reference Field model IGRF-13 (Alken et al., 2021). In 1978 CE, i.e. at 42 cm depth, the expected declination is  $6^\circ$ . To obtain this value, all declination values of GEM18-03 were shifted by  $+35^\circ$ . The section GEM18-04B overlaps GEM18-03 between 118 and 126 cm. The comparison of average declination in this range results in a shift by  $+100^\circ$  of GEM18-04B. The consistency of declination record between the two sections is satisfactory (Fig. D5d). In inclination, the two sections slightly differ at 188-126 cm (Fig. S11c). This difference probably comes from the fact that coring was not exactly vertical. At 42 cm depth, the measured inclination is  $6^\circ$  lower than the value predicted by IGRF-13 model. Adjusting GEM18-03 by this value makes its inclination record consistent with the one of GEM18-04B (Fig. S11e).

The inclination and declination GEM18-03/04B record shows short oscillations that are probably not related to secular variation of the geomagnetic field but rather to small disturbances of the sediment during or slightly after deposition (e.g., with bioturbations). To minimize the effect of these short oscillations and make easier the chronological interpretation, the signal was smoothed with a 8-cm sliding window.

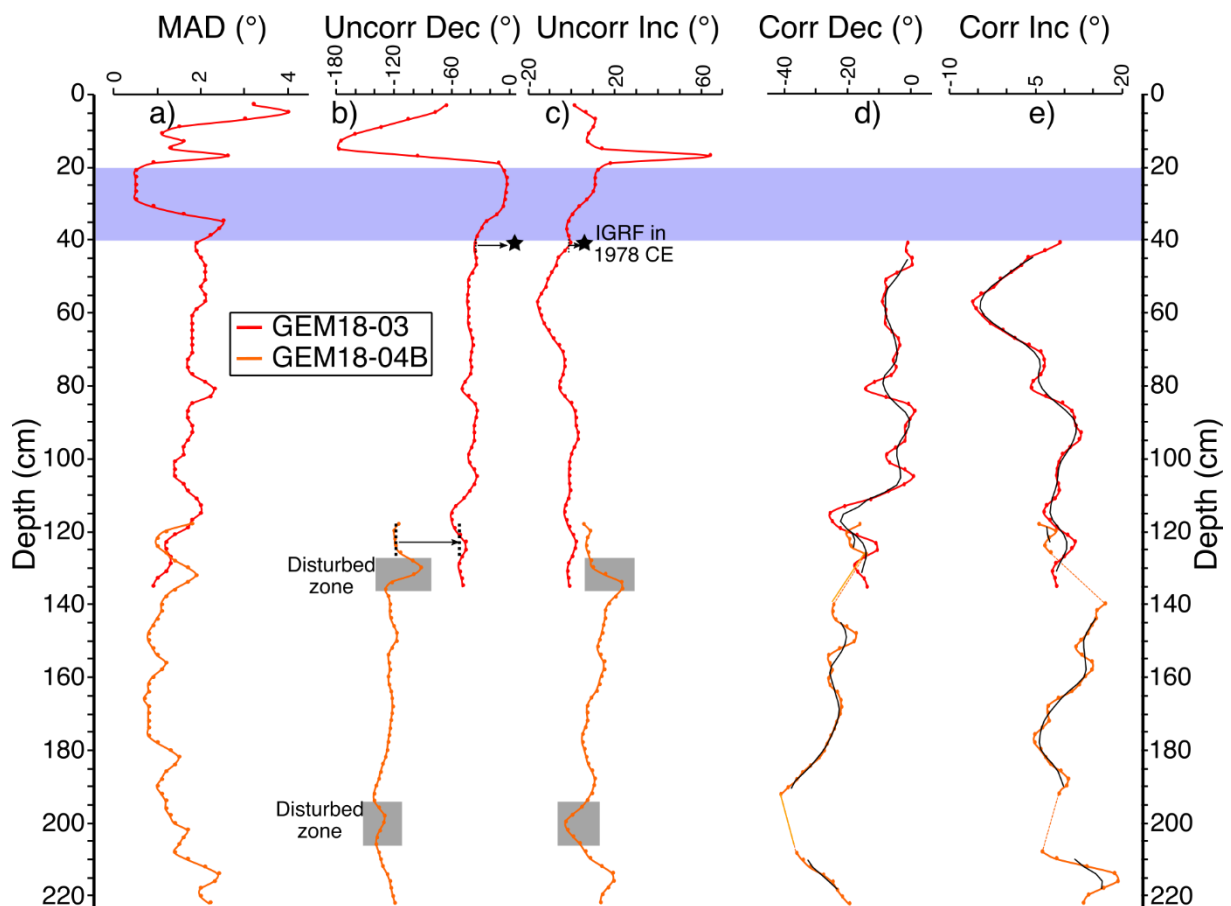

Figure S11: Direction of the Characteristic Remanent Magnetization (ChRM). (a) Maximum angular deviation (MAD) quantifying the quality of the direction. (b) Declination and (c) inclination raw values without orienting correction. Grey shaded areas correspond to discarded data because of disturbances in the sediment during the sampling process. (d) Declination and (e) inclination after orientation with IGRF values in 1980 at 42 cm for the top

and adjustment between the two sections using 118-125 cm average values. The thin black curves show the variation after smoothing with a 8-cm sliding window. Blue area highlight sediment affected by pedogenesis during the drought of the Lake in the 90s.

#### S4.2.3 Determination of the relative palaeointensity (RPI)

Below 40 cm, magnetic properties appear very favourable to the study of the RPI, because the ChRM is stable and because ferromagnetic grains are homogeneous in nature and size with a lithogenic origin and a low variation of their concentration along the core. The RPI estimation consists in a normalization of the NRM intensity by ARM intensity, IRM intensity or low-field susceptibility. ARM is generally preferred because it activates the same ferromagnetic grains as the NRM. We tested the three normalization factors using the NRM, IRM and ARM intensities remaining after 15 mT AF step, in order to remove the effect of the viscous component. The RPI was not estimated between 129 and 134 cm and between 196-204 cm for the same reasons as for the direction.

The three normalization factors provide similar RPI results, highlighting their robustness (Fig. S12). They show a relatively stable variation up to ~110 cm before an increase followed by a plateau from ~130 to 170-175 cm. A decrease of the RPI is finally observed up to 220 cm. The precise rate of this decrease is poorly constrained because of the lack of reliable data between 196 and 204 cm.

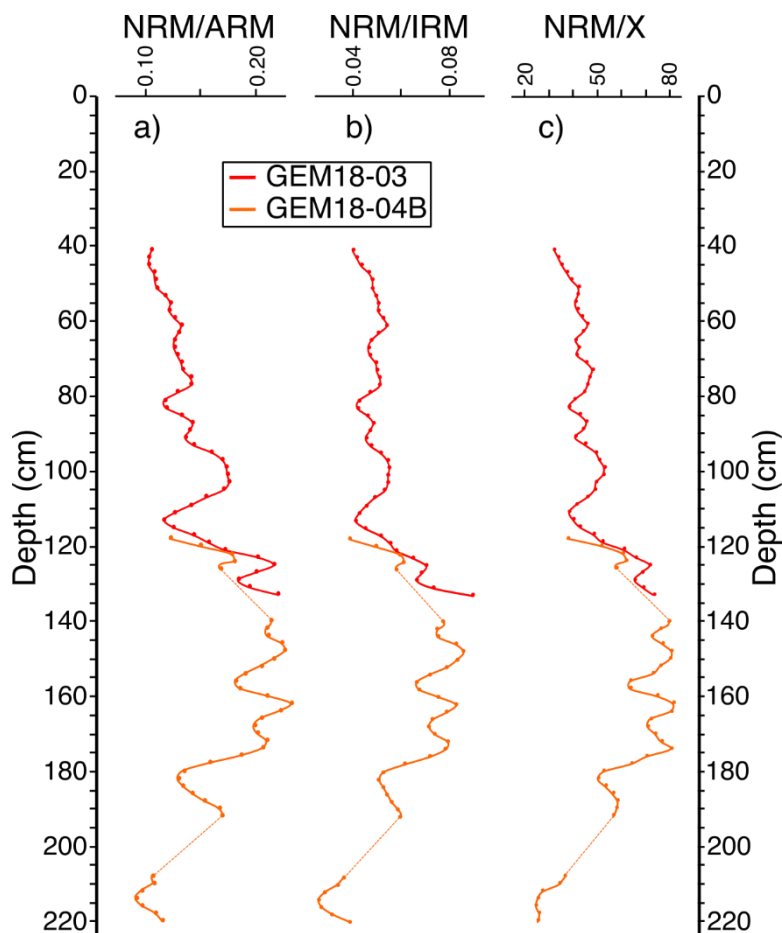

Figure S12: Relative palaeointensity records obtained on GEM18-03/04B using a) ARM intensity, b) IRM intensity and c) low-field susceptibility as normalizer of the NRM intensity. The first one was chosen for the comparison with geomagnetic models.

#### References

Alken, P., Thébault, E., Beggan, C.D. et al., 2021. International Geomagnetic Reference Field : the thirteenth generation. *Earth Planets Space* 73, 49. <https://doi.org/10.1186/s40623-020-01288-x>

Kirschvink, J.L., 1980. The least squares lines and plane analysis of palaeomagnetic data. Geophys. J. R. Astron. Soc. 62, 699–718.

Maher, B., Taylor, R., 1988. Formation of ultrafine-grained magnetite in soils. Nature, 336, 368-370.

## S5. Loss on Ignition

| Sample Name            | Weigh g<br>12h 65° | Weigh g<br>24h 105° | Weight g<br>5h 550° | Residual<br>H2O 5°(%) | LOI (%)    | Total depth |
|------------------------|--------------------|---------------------|---------------------|-----------------------|------------|-------------|
| <b>GEM18-03_9</b>      | 4.313              | 3.9168              | 3.5865              | 9.18618131            | 8.43290441 | 9           |
| <b>GEM18-03_30</b>     | 6.385              | 5.8862              | 5.3821              | 7.81205951            | 8.56409908 | 30          |
| <b>GEM18-03_103</b>    | 4.552              | 4.1855              | 3.8146              | 8.05140598            | 8.86154581 | 103         |
| <b>GEM18-04B_80-81</b> | 2.806              | 2.5323              | 2.3329              | 9.75409836            | 7.8742645  | 194         |
| <b>GEM18-04B_104</b>   | 4.693              | 4.2898              | 3.901               | 8.59151928            | 9.0633596  | 218         |

Table S1: Loss on Ignition table results on GEM18-03/-04 core

## S6. Clay X-Ray Diffraction

| GEM 18-03_30 |                                                |               |          |                 |               |                      |
|--------------|------------------------------------------------|---------------|----------|-----------------|---------------|----------------------|
| 142137G      |                                                |               |          |                 |               |                      |
| Pics         | Identification                                 | 2θ (°)        | d (Å)    | Intensité (cps) | Aire (2θ°cps) | F <sub>WHM</sub> (°) |
| 1            | Smectite (001)                                 | 4,7           | 18,6     | 7282            | 437449        | 0,98                 |
| 2            | Interstratifiés illite/smectite (001/001)      | 5,3           | 16,6     | 10294           | 348068        | 0,65                 |
| 3            | Chlorite (001)                                 | 6,3           | 14,1     | 2148            | 83176         | 0,67                 |
| 4            | Illite / mica (001)                            | 8,9           | 9,9      | 432             | 23769         | 0,97                 |
| 5            | Smectite (002) + interstratifiés I/S (001/002) | 10,4          | 8,5      | 965             | 51770         | 0,98                 |
| 6            | kaolinite (001)                                | 12,3          | 7,2      | 825             | 10367         | 0,24                 |
| 7            | Chlorite (002)                                 | 12,5          | 7,1      | 411             | 4324          | 0,20                 |
|              |                                                |               |          |                 |               |                      |
|              |                                                | Aire (2θ°cps) | Aire (%) |                 |               |                      |
|              | GEM 18-03_30                                   |               |          |                 |               |                      |
|              | Smectite                                       | 437449        | 48       |                 |               |                      |
|              | Interstratifiés illite/smectite                | 348068        | 39       |                 |               |                      |
|              | Chlorite                                       | 83176         | 9        |                 |               |                      |
|              | Illite / mica                                  | 23769         | 3        |                 |               |                      |
|              | kaolinite                                      | 10367         | 1        |                 |               |                      |
|              |                                                |               |          |                 |               |                      |
|              | Somme                                          | 902829        | 100      |                 |               |                      |

Table S2 : Clay XRD diffraction results of GEM18-03 30 cm sample

| GEM 18-03_105                 |                                              |               |          |                 |               |                      |
|-------------------------------|----------------------------------------------|---------------|----------|-----------------|---------------|----------------------|
| 142138G                       |                                              |               |          |                 |               |                      |
| Pics                          | Identification                               | 2θ (°)        | d (Å)    | Intensité (cps) | Aire (2θ°cps) | F <sub>WHM</sub> (°) |
| 1                             | Smectite (001)                               | 4,8           | 18,3     | 4600            | 259058        | 0,94                 |
| 2                             | Interstratiés illite/smectite (001/001)      | 5,3           | 16,5     | 7112            | 295147        | 0,77                 |
| 3                             | Chlorite (001)                               | 6,2           | 14,2     | 1059            | 28415         | 0,51                 |
| 4                             | Illite / mica (001)                          | 8,9           | 10,0     | 456             | 7357          | 0,31                 |
| 5                             | Smectite (002) + interstratiés I/S (001/002) | 10,3          | 8,6      | 480             | 30155         | 1,20                 |
| 6                             | kaolinite (001)                              | 12,3          | 7,2      | 493             | 6329          | 0,25                 |
| 7                             | Chlorite (002)                               | 12,5          | 7,1      | 635             | 7499          | 0,23                 |
|                               |                                              | Aire (2θ°cps) | Aire (%) |                 |               |                      |
| GEM 18-03_105                 |                                              | 259058        | 43       |                 |               |                      |
| Smectite                      |                                              | 259058        | 43       |                 |               |                      |
| Interstratiés illite/smectite |                                              | 295147        | 49       |                 |               |                      |
| Chlorite                      |                                              | 28415         | 5        |                 |               |                      |
| Illite / mica                 |                                              | 7357          | 1        |                 |               |                      |
| kaolinite                     |                                              | 6329          | 1        |                 |               |                      |
| Somme                         |                                              | 596306        | 100      |                 |               |                      |

Table S3: Clay XRD diffraction results of GEM18-03 105 cm sample

| GEM 18-04B_10                 |                                              |               |          |                 |               |                      |
|-------------------------------|----------------------------------------------|---------------|----------|-----------------|---------------|----------------------|
| 142139G                       |                                              |               |          |                 |               |                      |
| Pics                          | Identification                               | 2θ (°)        | d (Å)    | Intensité (cps) | Aire (2θ°cps) | F <sub>WHM</sub> (°) |
| 1                             | Smectite (001)                               | 4,6           | 19,2     | 2726            | 116545        | 0,80                 |
| 2                             | Interstratiés illite/smectite (001/001)      | 5,3           | 16,8     | 11515           | 548973        | 0,81                 |
| 3                             | Chlorite (001)                               | 6,2           | 14,2     | 932             | 31909         | 0,51                 |
| 4                             | Illite / mica (001)                          | 8,9           | 10,0     | 478             | 6734          | 0,27                 |
| 5                             | Smectite (002) + interstratiés I/S (001/002) | 10,3          | 8,6      | 586             | 40121         | 1,12                 |
| 6                             | kaolinite (001)                              | 12,4          | 7,2      | 798             | 8717          | 0,21                 |
| 7                             | Chlorite (002)                               | 12,5          | 7,1      | 567             | 5651          | 0,19                 |
|                               |                                              | Aire (2θ°cps) | Aire (%) |                 |               |                      |
| GEM 18-04B_10                 |                                              | 116545        | 16       |                 |               |                      |
| Smectite                      |                                              | 116545        | 16       |                 |               |                      |
| Interstratiés illite/smectite |                                              | 548973        | 77       |                 |               |                      |
| Chlorite                      |                                              | 31909         | 4        |                 |               |                      |
| Illite / mica                 |                                              | 6734          | 1        |                 |               |                      |
| kaolinite                     |                                              | 8717          | 1        |                 |               |                      |
| Somme                         |                                              | 712878        | 100      |                 |               |                      |

Table S4: Clay XRD diffraction results of GEM18-04 10 cm sample

| GEM 18-04B_80                 |                                              |               |          |                 |               |                      |
|-------------------------------|----------------------------------------------|---------------|----------|-----------------|---------------|----------------------|
| 142140G                       |                                              |               |          |                 |               |                      |
| Pics                          | Identification                               | 2θ (°)        | d (Å)    | Intensité (cps) | Aire (2θ°cps) | F <sub>WHM</sub> (°) |
| 1                             | Smectite (001)                               | 4,7           | 18,6     | 5369            | 326944        | 0,98                 |
| 2                             | Interstratiés illite/smectite (001/001)      | 5,3           | 16,6     | 9391            | 430048        | 0,83                 |
| 3                             | Chlorite (001)                               | 6,2           | 14,2     | 1194            | 36229         | 0,58                 |
| 4                             | Illite / mica (001)                          | 8,8           | 10,0     | 490             | 10824         | 0,42                 |
| 5                             | Smectite (002) + interstratiés I/S (001/002) | 10,2          | 8,6      | 762             | 50274         | 1,05                 |
| 6                             | kaolinite (001)                              | 12,3          | 7,2      | 717             | 9888          | 0,26                 |
| 7                             | Chlorite (002)                               | 12,5          | 7,1      | 585             | 7333          | 0,24                 |
|                               |                                              | Aire (2θ°cps) | Aire (%) |                 |               |                      |
| GEM 18-04B_80                 |                                              | 326944        | 40       |                 |               |                      |
| Smectite                      |                                              | 326944        | 40       |                 |               |                      |
| Interstratiés illite/smectite |                                              | 430048        | 53       |                 |               |                      |
| Chlorite                      |                                              | 36229         | 4        |                 |               |                      |
| Illite / mica                 |                                              | 10824         | 1        |                 |               |                      |
| kaolinite                     |                                              | 9888          | 1        |                 |               |                      |
| Somme                         |                                              | 813933        | 100      |                 |               |                      |

Table S5: Clay XRD diffraction results of GEM18-04 80 cm sample





|    |        |        |        |        |        |
|----|--------|--------|--------|--------|--------|
| Y  | 41,42  | 41,78  | 39,78  | 40,76  | 49,18  |
| Zr | 252,17 | 259,69 | 247,55 | 260,73 | 346,42 |
| Nb | 79,10  | 77,73  | 77,05  | 90,88  | 97,17  |
| Cd | 0,38   | 0,39   | 0,36   | 0,36   | 0,41   |
| Sn | 2,30   | 2,30   | 2,31   | 2,40   | 2,66   |
| Sb | 0,20   | 0,23   | 0,21   | 0,23   | 0,23   |
| Cs | 1,69   | 1,80   | 1,69   | 1,59   | 2,06   |
| Ba | 321,7  | 317,8  | 284,3  | 285,8  | 276,4  |
| La | 38,60  | 38,76  | 36,45  | 36,87  | 46,09  |
| Ce | 90,90  | 89,70  | 84,47  | 85,21  | 104,20 |
| Pr | 10,51  | 10,42  | 9,78   | 9,79   | 12,06  |
| Nd | 43,96  | 43,08  | 40,46  | 40,63  | 49,16  |
| Sm | 9,10   | 8,97   | 8,35   | 8,49   | 10,06  |
| Eu | 2,20   | 2,16   | 1,96   | 2,03   | 2,27   |
| Gd | 8,51   | 8,42   | 7,86   | 7,88   | 9,32   |
| Tb | 1,32   | 1,30   | 1,23   | 1,24   | 1,46   |
| Dy | 7,79   | 7,83   | 7,33   | 7,45   | 8,87   |
| Ho | 1,55   | 1,54   | 1,48   | 1,48   | 1,78   |
| Er | 4,29   | 4,20   | 4,01   | 4,11   | 4,99   |
| Tm | 0,60   | 0,59   | 0,57   | 0,58   | 0,71   |
| Yb | 3,83   | 3,86   | 3,72   | 3,74   | 4,61   |
| Lu | 0,57   | 0,56   | 0,56   | 0,55   | 0,68   |
| Hf | 7,04   | 7,02   | 6,63   | 6,80   | 8,99   |
| Ta | 5,05   | 4,77   | 4,94   | 5,60   | 5,99   |
| Pb | 3,85   | 3,85   | 3,58   | 3,79   | 4,59   |
| Th | 6,73   | 6,93   | 6,50   | 6,42   | 8,59   |
| U  | 1,50   | 1,79   | 1,39   | 1,34   | 1,61   |

Table S7

| Major Elements | Total depth (cm) | Sr (ppm) | Zr (ppm) | Si/Al    | Fe/Mg    | Sr/Th    | U/Th     |
|----------------|------------------|----------|----------|----------|----------|----------|----------|
| GEM18-03_25    | 25               | 469,8795 | 252,1657 | 3,218950 | 2,190685 | 69,84342 | 0,222558 |
|                |                  | 75       | 71       | 08       | 51       | 41       | 9        |
| GEM18-03_60    | 60               | 367,2346 | 259,6873 | 3,162734 | 2,549475 | 53,01940 | 0,257980 |
|                |                  | 04       | 87       | 27       | 78       | 95       | 47       |
| GEM18-03_90    | 90               | 379,0007 | 247,5549 | 3,252429 | 2,605815 | 58,27218 | 0,213613 |
|                |                  | 12       | 17       | 37       | 45       | 24       | 14       |
| GEM18-03_100   | 100              | 399,3612 | 260,7349 | 3,291845 | 2,746715 | 62,24314 | 0,208308 |
|                |                  | 4        | 81       | 92       | 45       | 5        | 75       |
| GEM18-04B_60   | 174              | 218,3413 | 346,4234 | 3,162231 | 2,901485 | 25,40386 | 0,187758 |
|                |                  | 97       | 98       | 01       | 72       | 98       | 04       |
| AFA18-02A-12   | 12               | 423,4    | 271,65   | 3,485910 | 2,071428 | 63,76    | 0,25     |
|                |                  |          |          | 13       | 57       |          |          |
| AFA18-02B-110  | 110              | 568,2    | 216,32   | 3,721217 | 1,963800 | 94,7     | 0,25     |
|                |                  |          |          | 11       | 9        |          |          |

Table S8

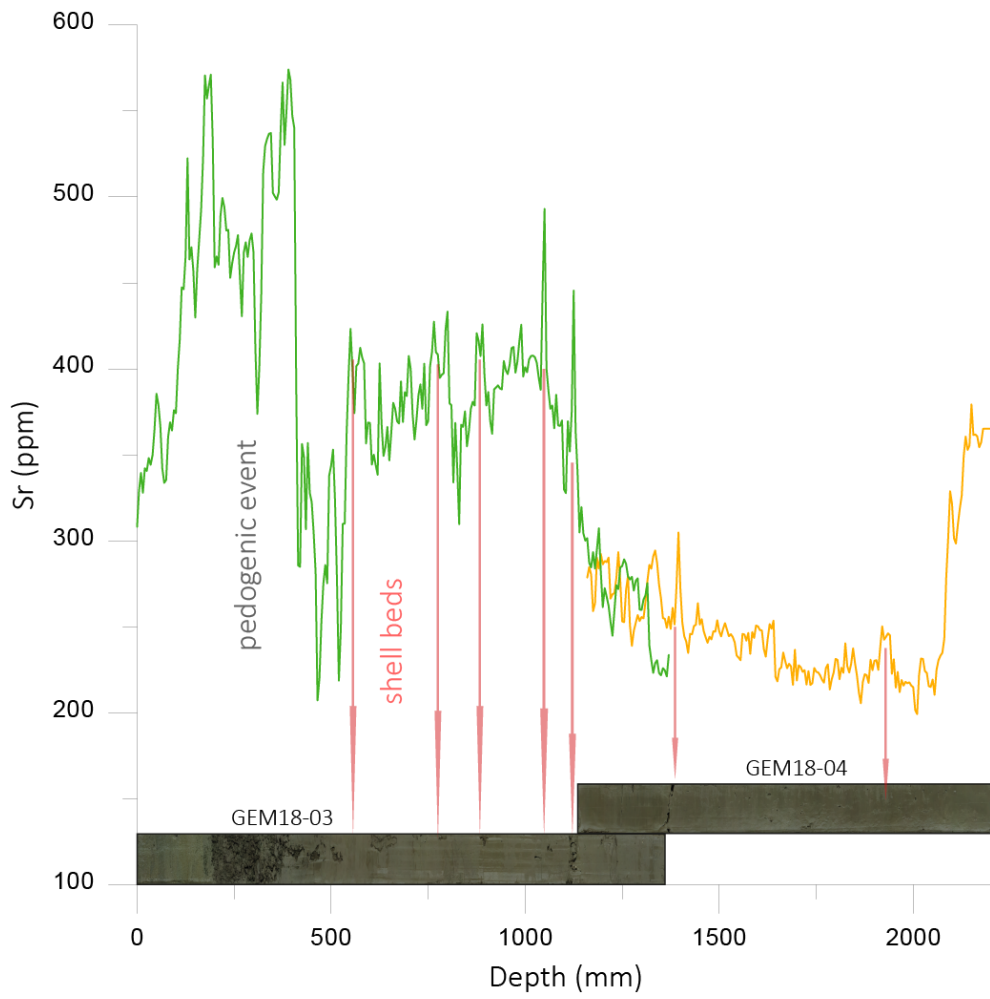

Figure S13: Sr values of GEM18-03 core with indicated the shell beds layers.

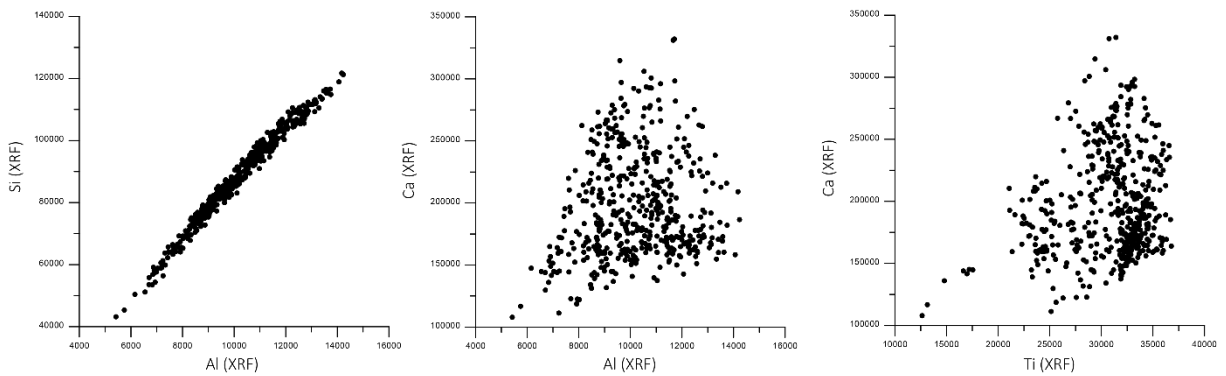

Figure S14 : Plots of Major elements (Counts; Al/Si, Al/Ca, Ti/Ca) measured by XRF-core scanner.

## S8. Radiocarbon material sampling AFA18-02 core

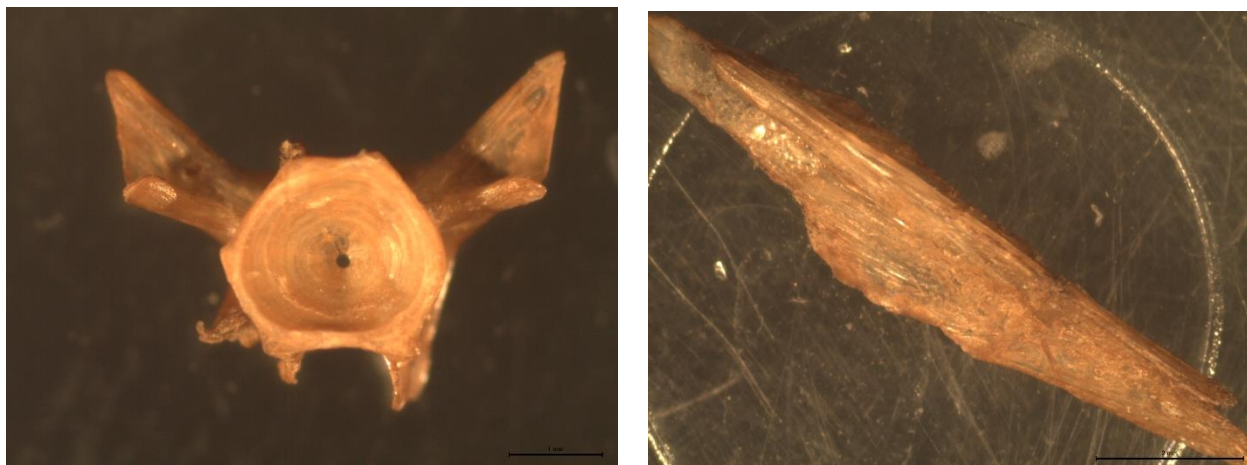

Figure S15 : *Haplotilapiini cf. Oreochromis niloticus* from 61 and 149.5 cm depth of the AFA18-02 core. GifA20055/ECHo3328 and GifA20056/ECHo3327 samples respectively (see Tab 2 in the main text of the article).

| Sample Name         | Total Depth (cm) | Material                                     | Weight  | Dating                          |                    |      |           | Conventional age | cal. BP/CE         |
|---------------------|------------------|----------------------------------------------|---------|---------------------------------|--------------------|------|-----------|------------------|--------------------|
|                     |                  |                                              |         | Type of analysis                | Lab Code           | mg C | Delta C13 |                  |                    |
| AFA18-02A_10.5-11   | 10.5-11          | bulk organic sediment                        | 4 g     | AMS 14C on bulk organic carbon  | SacA57084          | 0,60 | -28,10    | 315 ± 30         | CE                 |
| AFA18-02A_44        | 44               | bulk organic sediment                        | 4 g     | AMS 14C on bulk organic carbon  | SacA57085          | 0,90 | -19,70    | 640± 30          | BP                 |
| AFA18_02A_61        | 61               | Fish bone                                    | 9.2 mg  | AMS 14C on bone                 | GifA20055/ECHo3328 |      |           | 2008 AD          | CE                 |
| AFA18-02A_61        | 61               | bulk organic sediment                        | 4 g     | AMS 14C on bulk organic carbon  | SacA59130          | 1,19 | -24,5     | 610 ± 30         | BP                 |
| AFA18-02A_76        | 76               | bulk organic sediment                        | 4 g     | AMS 14C on bulk organic carbon  | SacA57086          | 1,03 | -20,60    | 365 ± 30         | BP                 |
| AFA18-02B_8-8.5     | 92               | bulk organic sediment                        | 4 g     | AMS 14C on bulk organic carbon  | SacA57087          | 1,09 | -21,90    | 165 ± 30         | BP                 |
| AFA18-02B_35-39     | 118-122          | vegetal macroremains                         | 1.2 mg  | AMS 14C on vegetal macroremains | GifA20052/ECHo3259 |      |           | 2000 CE          | CE                 |
| AFA18-02B_50.5-51   | 134.5-135        | bulk organic sediment                        | 3 g     | AMS 14C on bulk organic carbon  | SacA57088          | 1,21 | -23,40    | post 1950        | CE                 |
| AFA18-02B_51-53     | 134-136          | vegetal macroremains                         | 1.2 mg  | AMS 14C on vegetal macroremains | GifA20053/ECHo3260 |      |           | 1992 CE          | CE                 |
| AFA18_02B_66.5      | 149,5            | Fish bone                                    | 18.8 mg | AMS 14C on bone                 | GifA20056/ECHo3327 |      |           | 1985 CE          | CE                 |
| AFA18-02B_67        | 150              | bulk organic sediment                        | 5 g     | AMS 14C on bulk organic carbon  | SacA59131          | 1,08 | -21,1     | 320 ± 30         | BP                 |
| AFA18-02B_82.5-83.5 | 165.5-166.5      | vegetal macroremains                         |         | AMS 14C on vegetal macroremains | GifA20054/ECHo3261 |      |           | 1982 CE          | CE                 |
| AFA18-02B_81.5-82   | 165.5-170        | bulk organic sediment                        | 4 g     | AMS 14C on bulk organic carbon  | SacA57089          | 1,14 | -22,10    | post 1950        | CE                 |
| AFA18-02B_81-82     | 165-170          | bulk organic sediment + vegetal macroremains | 14.7 g  | AMS 14C on bulk organic carbon  |                    |      |           |                  |                    |
|                     |                  |                                              |         |                                 |                    |      |           |                  | Bulk OM            |
|                     |                  |                                              |         |                                 |                    |      |           |                  | Fish bone          |
|                     |                  |                                              |         |                                 |                    |      |           |                  | Vegetal macrorests |

Table S9 : List of radiocarbon samples detailed information from AFA18-02 sequence.

## S9. Radiocarbon material sampling GEM18-03/-04B core

| Core GEM18-03/04B _ Samples for 14C Dating |                       |                  |                  |        |         |           |      |           |                  |
|--------------------------------------------|-----------------------|------------------|------------------|--------|---------|-----------|------|-----------|------------------|
| Sampling                                   |                       |                  |                  |        |         |           |      |           |                  |
| N°                                         | Sample Name           | Total Depth (cm) | Material         | Weight | Lab     | Lab Code  | mg C | Delta C13 | Conventional age |
| 1                                          | GEM18-03_14-15        | 14               | organic sediment | 4.3    | Artemis | SacA57090 | 1,06 | -20,70    | 175 ± 30         |
| 2                                          | GEM18-03_48-49        | 48,5             | organic sediment | 4.77   | Artemis | SacA57091 | 0,90 | -14,00    | 170 ± 30         |
| 3                                          | GEM18-03_48-49_malaco | 48,5             | shell (melania)  |        | Artemis | SacA57092 | 1,44 | -2,4      | post 1950        |
| 4                                          | GEM18-03_84           | 84               | organic sediment | ~ 4 g  | Artemis | SacA59132 | 1,02 | -19,7     | 1975 ± 30        |
| 5                                          | GEM18-03_84_malaco    | 84               | shell (melania)  | ~ 4 g  | Artemis | SacA59133 | 1,21 | -0,1      | 725 ± 30         |
| 6                                          | GEM18-03_113          | 113              | organic sediment | 4.165  | Artemis | SacA57093 | 1,12 | -23,10    | 1760 ± 30        |
| 7                                          | GEM18-03_120          | 120              | organic sediment | ~ 4 g  | Artemis | SacA59134 | 1,8  | -18,2     | 2465 ± 30        |
| 8                                          | GEM18-04B_10          | 124              | organic sediment | ~ 4 g  | Artemis | SacA59135 | 1,03 | -17,1     | 2465 ± 30        |
| 9                                          | GEM18-04B_53          | 167              | organic sediment | 4.3 g  | Artemis | SacA59136 | 1,02 | -17,8     | 2845 ± 30        |
| 10                                         | GEM18-04B_53_malaco   | 167              | shell (melania)  | 4.77 g | Artemis | SacA59137 | 1,38 | -5,5      | 680 ± 30         |
| 11                                         | GEM18-04B_100         | 214              | organic sediment | 4.9    | Artemis | SacA57094 | 1,01 | -23,30    | 2330 ± 30        |
| 12                                         | GEM18-04B_106         | 220              | organic sediment | 4g     | Artemis | SacA59138 | 1    | -19,3     | 1785 ± 30        |

Table S10 : List of radiocarbon samples detailed information from GEM18-03/-04B sequence.

## S10. Grain Size distribution

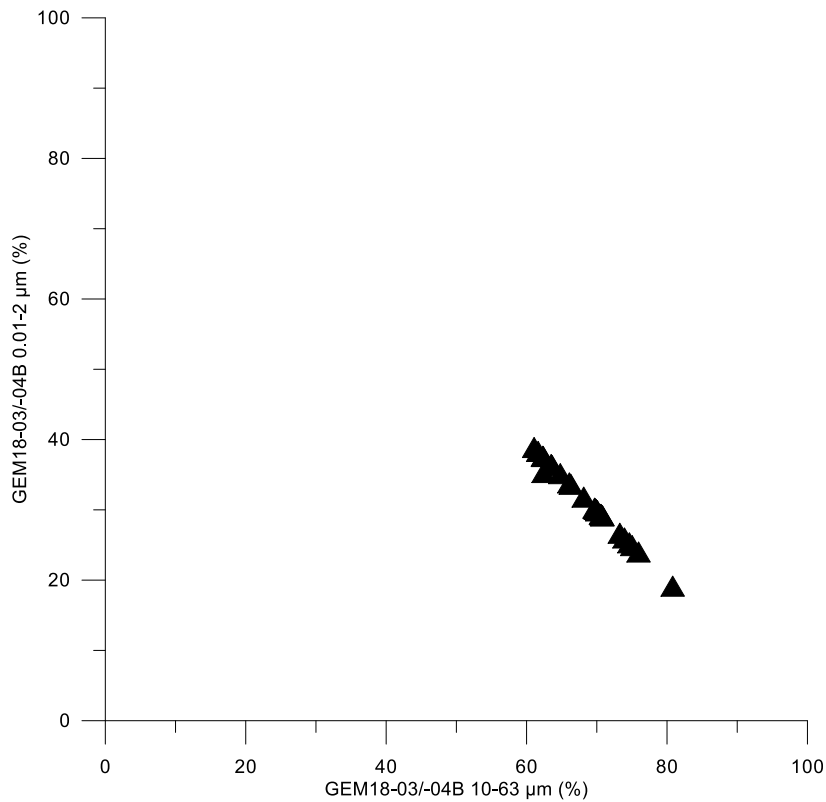

Figure S16 : Plot of GEM18-03/-04B core 0.01-2µm vs 10-63µm grain size

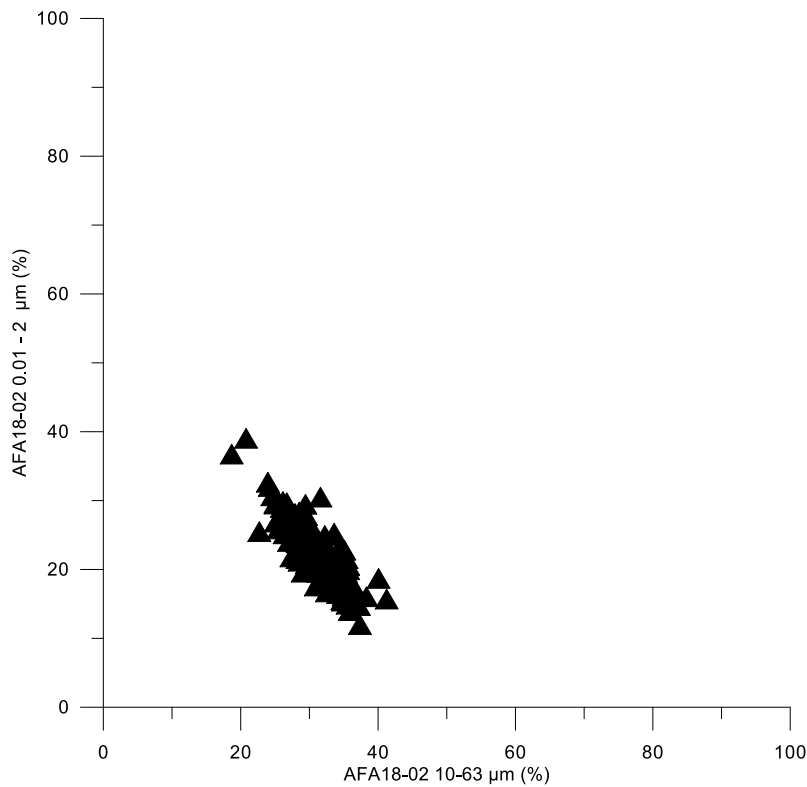

Figure S17 : Plot of AFA18-02-A core 0.01-2μm vs 10-63μm grain size

### S11. Stokes Law calculation of Lake Afambo sediments

| Formula parameter | Description                                                                                                                                                     | Value               | Unit              |
|-------------------|-----------------------------------------------------------------------------------------------------------------------------------------------------------------|---------------------|-------------------|
| g                 | Gravity acceleration                                                                                                                                            | 9.80665             | m/s <sup>2</sup>  |
| μ                 | Medium viscosity of water at 28°C                                                                                                                               | 0.0008324           | Pa.s              |
| p_m               | Medium density of water at 28°C (calculated from conductivity and temperature measurements in the Lake Afambo obtained in October 2023; conductivity = 2916 uS) | 0.9956              | kg/m <sup>3</sup> |
| p_p               | Particle density (smectite)                                                                                                                                     | 2.2                 | g/cm <sup>3</sup> |
| d                 | Medium particle diameter (total grain size mean of AFA18-02 core)                                                                                               | 0.006748            | mm                |
| <b>v</b>          | <b>Terminal Velocity</b>                                                                                                                                        | <b>0.0000655379</b> | <b>m/s</b>        |

Table S11 : Lake Afambo parameters for the Stokes Law calculation.

$$v = g \times d^2 \times (\rho_p - \rho_m) / (18 \times \mu)$$

The Stokes Law calculation (McCave, 2005) for Lake Afambo sediments indicates a 0.0000655379 m/s of sedimentation speed. For the 17m of water depth of the lake Afambo, a sediment particle takes an average of ~72 hr to reach the bottom of the lake.

McCave, I.N., 2005. SEDIMENTARY PROCESSES | Deposition from Suspension, in: Selley, R.C., Cocks, L.R.M., Plimer, I.R. (Eds.), Encyclopedia of Geology. Elsevier, Oxford, pp. 8–17.  
<https://doi.org/10.1016/B0-12-369396-9/00490-1>

## S12. Lake Gamari Water Surface Variations

Detail of Lake Gemberi Water surface change analyses from satellite images.

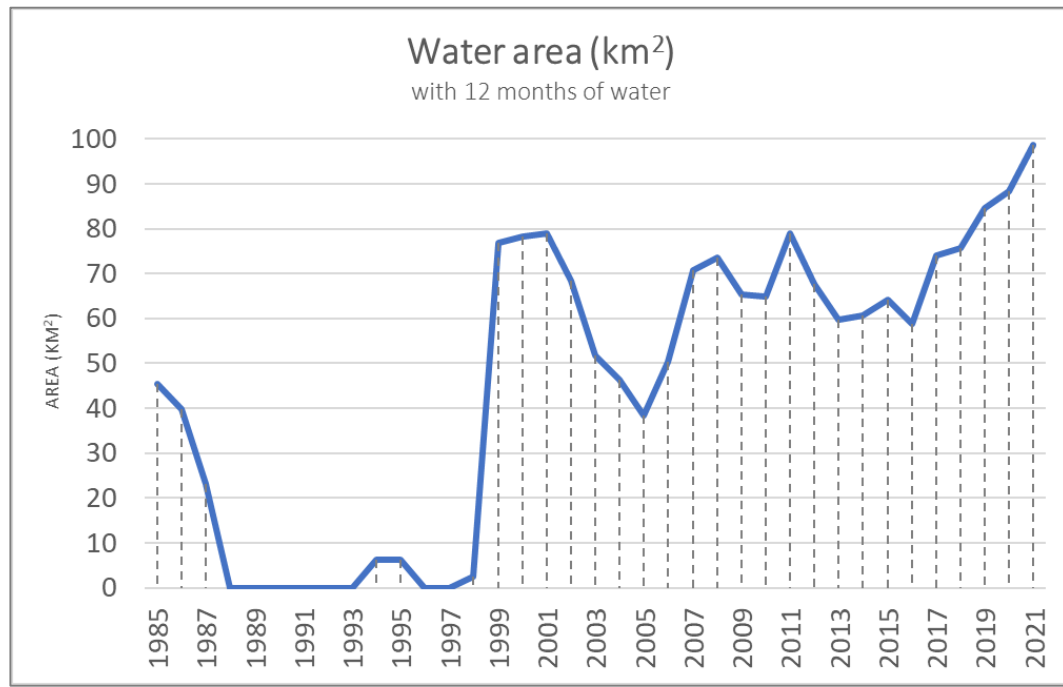

Figure S18 : Lake Gemberi water surface changes calculated from pixels of the 12 months of water + pixels 1 month of water (light + navy blue in Fig. S28).

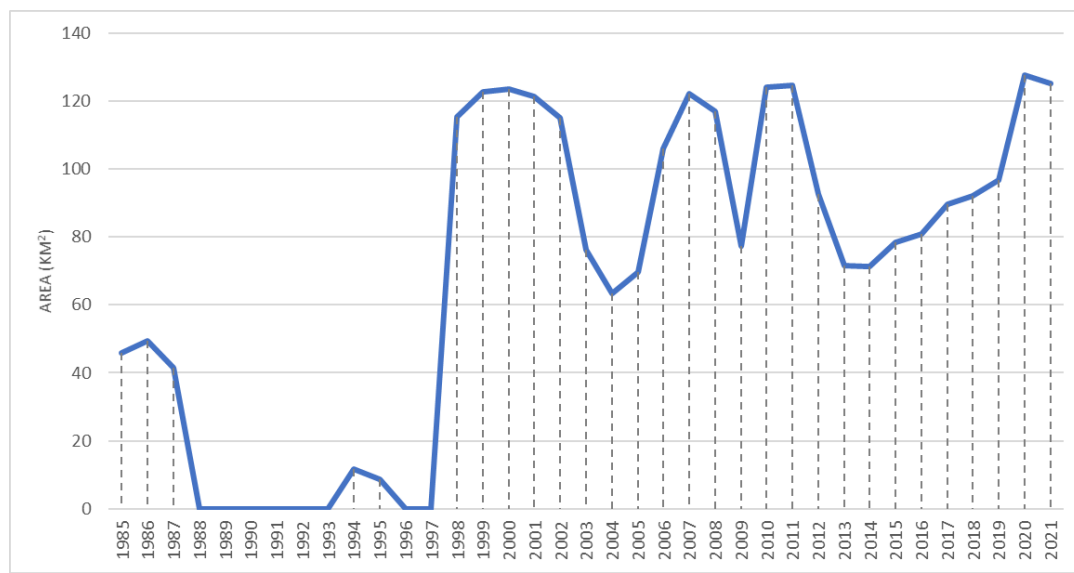

Figure S19 : Lake Gemberi water surface changes calculated from pixels of the 12 months of water (permanent water) (only navy blue in Fig. S28).



| Symbol                                                                            | Colour  | Label                                |
|-----------------------------------------------------------------------------------|---------|--------------------------------------|
|                                                                                   | #FFFFFF | Not water                            |
|  | #99D9EA | 1 month of water                     |
|  | #0000AA | 12 months of water (permanent water) |
|  | #CCCCCC | No data                              |

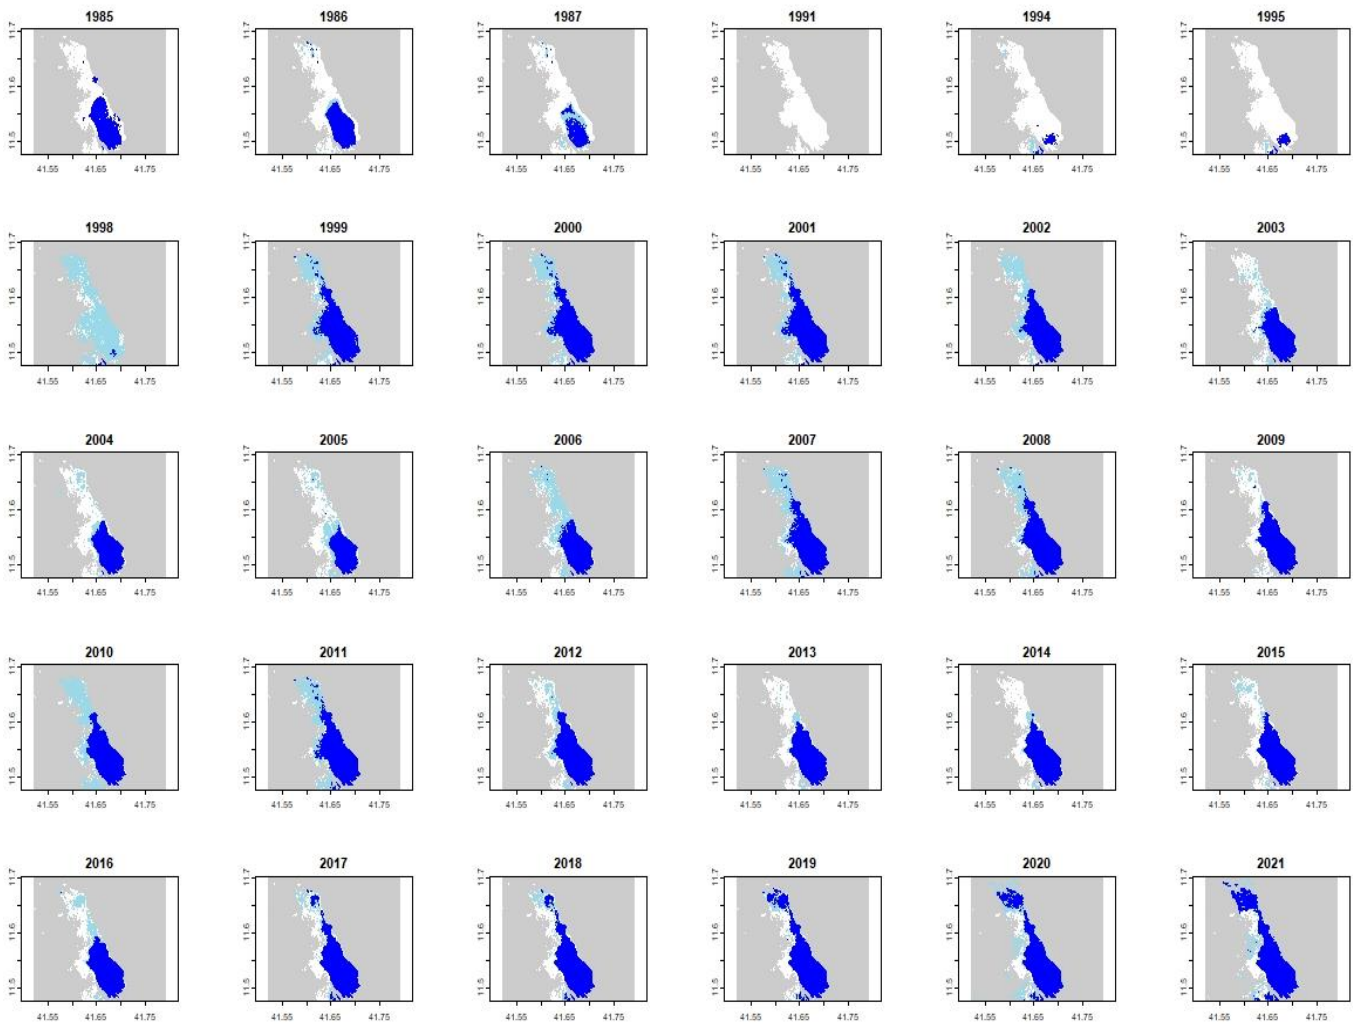

Figure S20 : Detail of Lake Gemi Water surface variation between 1985 and 2021.
